# Supplementary material for: Osteogenesis and angiogenesis are simultaneously enhanced in BMP2-/VEGF-transfected adipose stem cells through activation of the YAP/TAZ signaling pathway
Source: Royal Society of Chemistry journal article supplement (doi:10.1039/c9bm01037h), 2019-01-01
Supplement: c9bm01037h1.pdf [file c9bm01037h1.pdf]

[여기에 입력]

## Supplemental Information

### Supplementary Figure

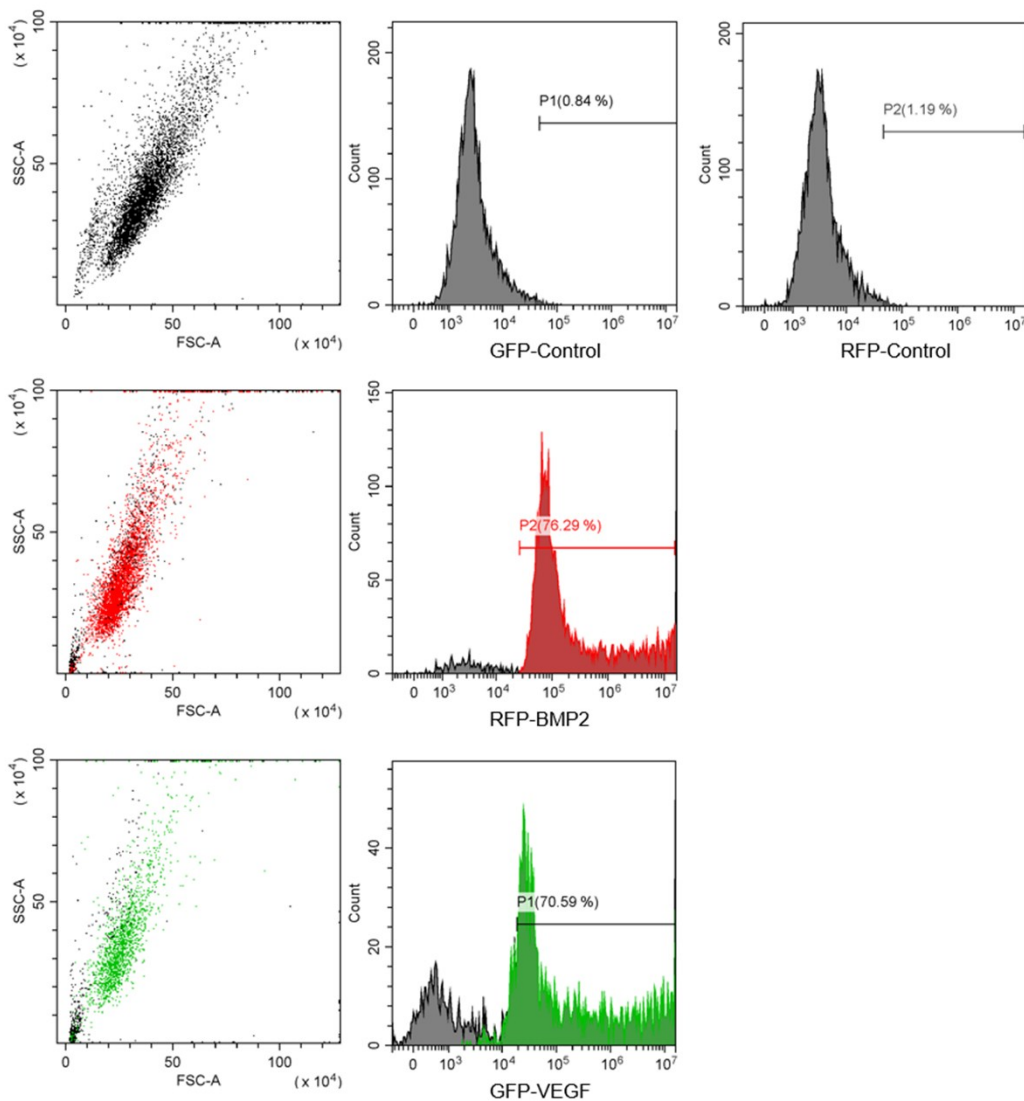

**Fig. S1** Flow cytometry analysis of BMP2- or VEGF-transfected hASCs. Transfection rate was measured for BMP2 by co-tagged RFP and VEGF by co-tagged GFP. FACS was performed with CytoFLEX equipment (Beckman Coulter, Brea, CA).

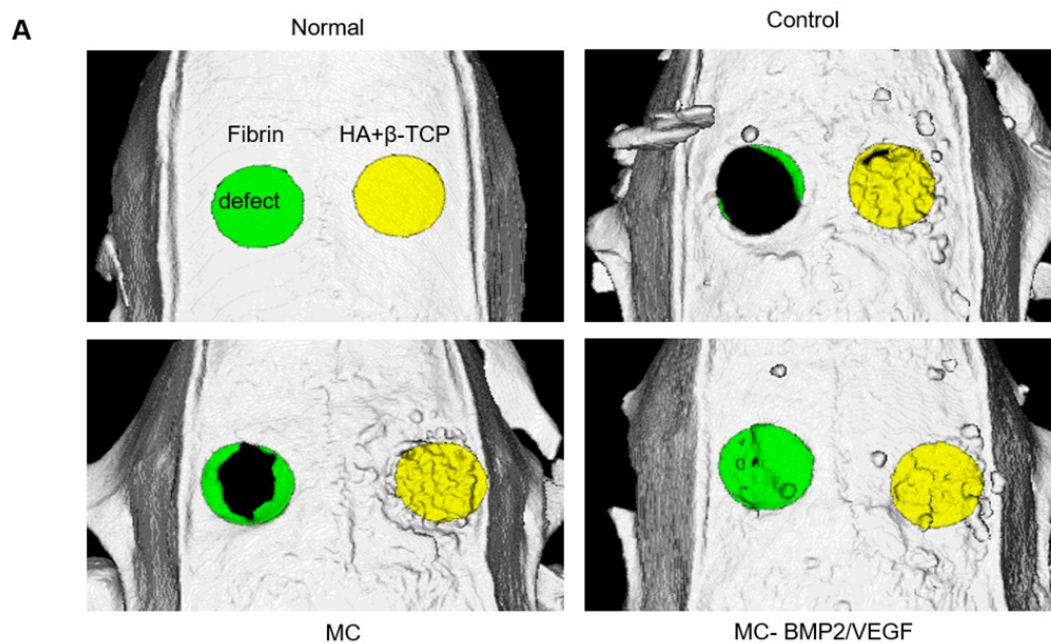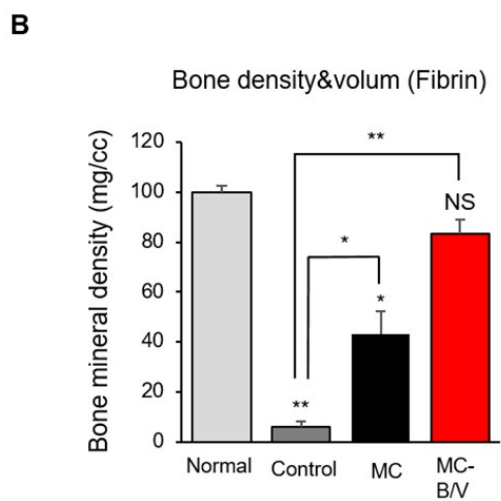

**Fig. S2** (A) Bone mineral density and (B) Graph from critical-size defect animal model by coimplantation of ASCs with introduced MC-BMP2 and MC-VEGF. Normal, non-surgery without cell implantation; control, surgery only without cell implantation; MC, minicircle plasmid vector-transfected ASCs implantation; MC-BMP2/VEGF (M-B/V), BMP2/ VEGF-transfected ASCs implantation.

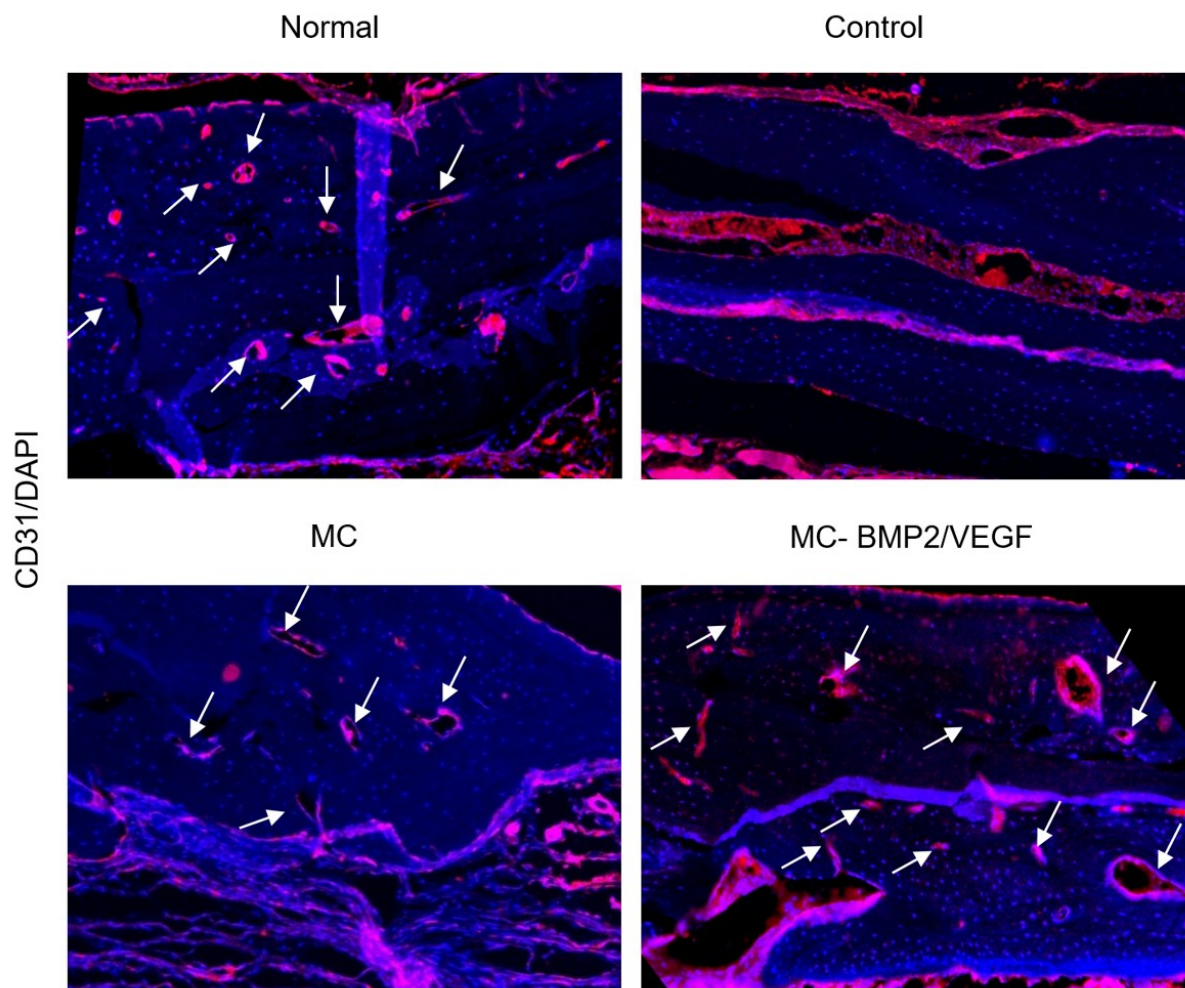

**Fig. S3** CD31 staining, an indicator of neovascularization from critical-size defect animal model by coimplantation of ASCs with introduced MC-BMP2 and MC-VEGF at 40X magnification. Normal, non-surgery without cell implantation; control, surgery only without cell implantation; MC, minicircle plasmid vector-transfected ASCs implantation; MC-BMP2/VEGF, BMP2/ VEGF-transfected ASCs implantation.

## Supplementary Table

Table S1 The primers used in RT-qPCR.

| Primer                                             | Sequence (5'→3')      |
|----------------------------------------------------|-----------------------|
| <i>Bone Morphogenetic Protein 2</i> forward        | AACAATGGCATGATTAGTGG  |
| <i>Bone Morphogenetic Protein 2</i> reverse        | TTGGAGGAGAAACAAGGTG   |
| <i>Vascular endothelial growth factor</i> forward  | TCTTCAAGCCATCCTGTGTG  |
| <i>Vascular endothelial growth factor</i> reverse  | GCGAGTCTGTGTTTGAG     |
| <i>Osteocalcin</i> forward                         | GGGGCTACCTGTATCAATGG  |
| <i>Osteocalcin</i> reverse                         | TCAGCCAACTCGTCACAGTC  |
| <i>Bone sialoprotein</i> forward                   | AGAACCCTTCCCCACCTTT   |
| <i>Bone sialoprotein</i> reverse                   | AGGTTCCCGTTCTCACTT    |
| <i>Runt-related transcription factor 2</i> forward | CGGTCTCCTCCAGGATGGT   |
| <i>Runt-related transcription factor 2</i> reverse | GCTTCCGTCAGCGTCAACA   |
| <i>Collagen I</i> forward                          | AACCCGAGGTATGCTTGATCT |
| <i>Collagen I</i> reverse                          | CCAGTTCTTCATTGCATTGC  |

Table S2 Primary antibodies used in western blotting.

| Target | Antibody                               | Company        | Catalogue No. |
|--------|----------------------------------------|----------------|---------------|
| BMP2   | Rabbit-BMP2 Antibody                   | Abcam          | Ab14933       |
| VEGF   | Rabbit-VEGF Receptor 1 Antibody [Y103] | Abcam          | Ab32152       |
| ANKRD1 | Rabbit-ANKRD1 antibody                 | Abcam          | Ab64963       |
| Runx2  | Mouse-Runx2 antibody                   | Abcam          | Ab76956       |
| COL1   | Mouse-Collagen1 antibody               | Abcam          | Ab90395       |
| TEAD1  | Rabbit-TEAD1 antibody                  | Cell Signaling | #12292S       |
| p-YAP  | Rabbit-phospho-YAP antibody            | Cell Signaling | #13008        |
| YAP    | Rabbit-YAP/TAZ antibody                | Cell Signaling | #8418s        |
| p-TAZ  | Rabbit-phospho-TAZ antibody            | Cell Signaling | #59971        |
| TAZ    | Rabbit-YAP/TAZ antibody                | Cell Signaling | #8418S        |
| GAPDH  | Rabbit-GAPDH antibody                  | BETHYL         | A300-641A-M   |
